# Supplementary material
Source: MDPI journal article supplement (https://www.mdpi.com/2072-4292/8/7/582)
Supplement: s1 [file s1]

Supplementary Materials: Extracting Canopy Surface Texture from Airborne Laser Scanning Data for the Supervised and Unsupervised Prediction of Area-based Forest Characteristics. *Remote Sens.* 2016, *8*, Article No.

**Mikko T. Niemi and Jari Vauhkonen**

**Table S1.** Coefficients of determination (R2) between 87 CHM textural features and various forest attributes. The coefficient of variation of basal area (CV(G)) was computed from both circular 9-m reference plots and large 30 m x 30 m squares, whereas the other features and forest attributes were based on the circular reference plots (radius of 9 m).

| **Feature** | **V** | **G** | **DgM** | **CV(DBH)** | **Nunderstorey** | **CV(G)**  **(r = 9 m)** | **CV(G)**  **(30 m sq)** |
| --- | --- | --- | --- | --- | --- | --- | --- |
| CHMmean | 0.70 | 0.63 | 0.15 | 0.00 | 0.04 | 0.21 | 0.21 |
| CHMstd | 0.08 | 0.00 | 0.68 | 0.06 | 0.00 | 0.01 | 0.00 |
| CHMmax | 0.22 | 0.07 | 0.69 | 0.05 | 0.00 | 0.00 | 0.02 |
| TP5m_% | 0.47 | 0.61 | 0.00 | 0.01 | 0.08 | 0.32 | 0.32 |
| TP5m_den | 0.24 | 0.27 | 0.02 | 0.01 | 0.03 | 0.10 | 0.08 |
| TP5m_avg | 0.38 | 0.47 | 0.00 | 0.01 | 0.03 | 0.19 | 0.13 |
| TP5m_std | 0.00 | 0.00 | 0.00 | 0.00 | 0.03 | 0.00 | 0.04 |
| TP5m_N | 0.35 | 0.43 | 0.06 | 0.00 | 0.03 | 0.27 | 0.12 |
| TPad_% | 0.32 | 0.28 | 0.04 | 0.01 | 0.02 | 0.24 | 0.16 |
| TPad_den | 0.00 | 0.00 | 0.03 | 0.01 | 0.00 | 0.01 | 0.05 |
| TPad_avg | 0.16 | 0.13 | 0.03 | 0.00 | 0.00 | 0.05 | 0.04 |
| TPad_std | 0.10 | 0.11 | 0.01 | 0.00 | 0.02 | 0.11 | 0.05 |
| TPad_N | 0.17 | 0.14 | 0.19 | 0.00 | 0.00 | 0.23 | 0.08 |
| ASMlag = 1 | 0.19 | 0.31 | 0.01 | 0.00 | 0.08 | 0.31 | 0.34 |
| ASMlag = 2 | 0.18 | 0.29 | 0.00 | 0.00 | 0.08 | 0.32 | 0.35 |
| ASMlag = 3 | 0.18 | 0.28 | 0.00 | 0.00 | 0.08 | 0.32 | 0.35 |
| ASMlag = 4 | 0.17 | 0.27 | 0.00 | 0.00 | 0.07 | 0.32 | 0.35 |
| ASMlag = 5 | 0.17 | 0.27 | 0.00 | 0.00 | 0.07 | 0.32 | 0.35 |
| CONlag = 1 | 0.02 | 0.01 | 0.01 | 0.00 | 0.01 | 0.15 | 0.13 |
| CONlag = 2 | 0.00 | 0.00 | 0.03 | 0.00 | 0.00 | 0.14 | 0.14 |
| CONlag = 3 | 0.00 | 0.00 | 0.11 | 0.00 | 0.00 | 0.11 | 0.11 |
| CONlag = 4 | 0.00 | 0.01 | 0.18 | 0.00 | 0.00 | 0.08 | 0.09 |
| CONlag = 5 | 0.00 | 0.01 | 0.22 | 0.01 | 0.00 | 0.06 | 0.07 |
| CORlag = 1 | 0.05 | 0.08 | 0.13 | 0.03 | 0.01 | 0.04 | 0.17 |
| CORlag = 2 | 0.02 | 0.04 | 0.17 | 0.06 | 0.01 | 0.07 | 0.26 |
| CORlag=3 | 0.02 | 0.02 | 0.07 | 0.05 | 0.01 | 0.09 | 0.27 |
| CORlag = 4 | 0.01 | 0.01 | 0.00 | 0.04 | 0.01 | 0.08 | 0.25 |
| CORlag = 5 | 0.00 | 0.00 | 0.02 | 0.00 | 0.00 | 0.03 | 0.22 |
| VARlag = 1 | 0.46 | 0.51 | 0.01 | 0.01 | 0.04 | 0.26 | 0.26 |
| VARlag = 2 | 0.46 | 0.51 | 0.01 | 0.01 | 0.04 | 0.25 | 0.26 |
| VARlag = 3 | 0.46 | 0.51 | 0.01 | 0.01 | 0.04 | 0.25 | 0.26 |
| VARlag = 4 | 0.46 | 0.51 | 0.01 | 0.01 | 0.04 | 0.25 | 0.26 |
| VARlag = 5 | 0.46 | 0.51 | 0.01 | 0.01 | 0.04 | 0.25 | 0.27 |
| IDMlag = 1 | 0.03 | 0.01 | 0.01 | 0.00 | 0.01 | 0.15 | 0.14 |
| IDMlag = 2 | 0.01 | 0.00 | 0.02 | 0.00 | 0.01 | 0.15 | 0.16 |
| IDMlag = 3 | 0.00 | 0.00 | 0.08 | 0.00 | 0.00 | 0.11 | 0.13 |
| IDMlag = 4 | 0.00 | 0.00 | 0.15 | 0.00 | 0.00 | 0.09 | 0.11 |
| IDMlag = 5 | 0.00 | 0.01 | 0.20 | 0.01 | 0.00 | 0.07 | 0.08 |
| SAVGlag = 1 | 0.46 | 0.55 | 0.00 | 0.01 | 0.05 | 0.28 | 0.30 |
| SAVGlag = 2 | 0.46 | 0.55 | 0.00 | 0.01 | 0.05 | 0.27 | 0.30 |
| SAVGlag=3 | 0.46 | 0.55 | 0.00 | 0.01 | 0.05 | 0.27 | 0.30 |
| SAVGlag = 4 | 0.45 | 0.55 | 0.00 | 0.01 | 0.05 | 0.27 | 0.30 |
| SAVGlag = 5 | 0.45 | 0.55 | 0.00 | 0.01 | 0.05 | 0.27 | 0.30 |
| SVARlag = 1 | 0.45 | 0.48 | 0.01 | 0.01 | 0.03 | 0.22 | 0.23 |
| SVARlag = 2 | 0.44 | 0.49 | 0.01 | 0.01 | 0.03 | 0.20 | 0.23 |
| SVARlag = 3 | 0.44 | 0.50 | 0.00 | 0.01 | 0.03 | 0.19 | 0.23 |
| SVARlag = 4 | 0.43 | 0.49 | 0.00 | 0.01 | 0.03 | 0.19 | 0.23 |
| SVARlag=5 | 0.43 | 0.49 | 0.00 | 0.01 | 0.03 | 0.19 | 0.23 |
| SENTlag=1 | 0.15 | 0.22 | 0.00 | 0.00 | 0.07 | 0.26 | 0.27 |
| SENTlag = 2 | 0.13 | 0.17 | 0.01 | 0.00 | 0.06 | 0.23 | 0.23 |
| SENTlag = 3 | 0.11 | 0.15 | 0.01 | 0.00 | 0.06 | 0.21 | 0.20 |
| SENTlag=4 | 0.11 | 0.15 | 0.01 | 0.00 | 0.06 | 0.20 | 0.20 |
| SENTlag=5 | 0.11 | 0.15 | 0.01 | 0.00 | 0.06 | 0.20 | 0.19 |
| ENTlag = 1 | 0.15 | 0.24 | 0.01 | 0.00 | 0.07 | 0.22 | 0.26 |
| ENTlag = 2 | 0.15 | 0.24 | 0.00 | 0.00 | 0.07 | 0.21 | 0.25 |
| ENTlag = 3 | 0.15 | 0.24 | 0.00 | 0.00 | 0.07 | 0.20 | 0.24 |
| ENTlag = 4 | 0.15 | 0.24 | 0.00 | 0.00 | 0.07 | 0.20 | 0.23 |
| ENTlag=5 | 0.15 | 0.24 | 0.00 | 0.00 | 0.08 | 0.20 | 0.22 |
| DENTlag=1 | 0.09 | 0.10 | 0.00 | 0.00 | 0.05 | 0.24 | 0.26 |
| DENTlag = 2 | 0.07 | 0.08 | 0.00 | 0.00 | 0.04 | 0.24 | 0.27 |
| DENTlag = 3 | 0.07 | 0.08 | 0.02 | 0.00 | 0.04 | 0.22 | 0.25 |
| DENTlag = 4 | 0.07 | 0.07 | 0.03 | 0.00 | 0.04 | 0.20 | 0.23 |
| DENTlag = 5 | 0.07 | 0.07 | 0.04 | 0.01 | 0.04 | 0.18 | 0.20 |
| IMC1lag = 1 | 0.08 | 0.13 | 0.12 | 0.03 | 0.05 | 0.13 | 0.29 |
| IMC1lag = 2 | 0.08 | 0.11 | 0.11 | 0.03 | 0.04 | 0.13 | 0.36 |
| IMC1lag = 3 | 0.09 | 0.11 | 0.06 | 0.02 | 0.04 | 0.11 | 0.32 |
| IMC1lag = 4 | 0.07 | 0.10 | 0.10 | 0.03 | 0.05 | 0.06 | 0.30 |
| IMC1lag = 5 | 0.03 | 0.04 | 0.08 | 0.03 | 0.03 | 0.01 | 0.24 |
| IMC2lag = 1 | 0.00 | 0.00 | 0.15 | 0.07 | 0.00 | 0.01 | 0.09 |
| IMC2lag = 2 | 0.00 | 0.00 | 0.13 | 0.08 | 0.01 | 0.02 | 0.22 |
| IMC2lag = 3 | 0.00 | 0.00 | 0.07 | 0.04 | 0.00 | 0.00 | 0.24 |
| IMC2lag = 4 | 0.01 | 0.02 | 0.08 | 0.03 | 0.00 | 0.03 | 0.22 |
| IMC2lag = 5 | 0.01 | 0.03 | 0.04 | 0.03 | 0.00 | 0.07 | 0.20 |
| U0lag = 1 | 0.13 | 0.18 | 0.00 | 0.00 | 0.01 | 0.12 | 0.11 |
| U0lag = 2 | 0.14 | 0.20 | 0.01 | 0.00 | 0.01 | 0.10 | 0.09 |
| U0lag = 3 | 0.09 | 0.14 | 0.01 | 0.00 | 0.00 | 0.06 | 0.05 |
| U2lag = 1 | 0.06 | 0.12 | 0.00 | 0.00 | 0.00 | 0.07 | 0.12 |
| U2lag = 2 | 0.08 | 0.13 | 0.03 | 0.02 | 0.00 | 0.07 | 0.07 |
| U2lag = 3 | 0.02 | 0.05 | 0.00 | 0.03 | 0.00 | 0.02 | 0.01 |
| U4lag = 1 | 0.02 | 0.04 | 0.00 | 0.01 | 0.02 | 0.03 | 0.07 |
| U4lag = 2 | 0.03 | 0.03 | 0.03 | 0.02 | 0.00 | 0.00 | 0.01 |
| U4lag = 3 | 0.01 | 0.01 | 0.00 | 0.01 | 0.01 | 0.00 | 0.04 |

**Table S2.** Coefficients of determination (R2) between 52 point-based features and various forest attributes. The coefficient of variation of basal area (CV(G)) was computed from both circular 9-m reference plots and large 30 m × 30 m squares, whereas the other features and forest attributes were based on the circular field plots (radius of 9 m).

| **Feature** | **V** | **G** | **DgM** | **CV(DBH)** | **Nunderstorey** | **CV(G)**  **(*r* = 9m)** | **CV(G)**  **(30 m sq)** |
| --- | --- | --- | --- | --- | --- | --- | --- |
| H_maxFP | 0.22 | 0.07 | 0.69 | 0.05 | 0.00 | 0.00 | 0.02 |
| H_meanFP | 0.43 | 0.22 | 0.51 | 0.00 | 0.02 | 0.12 | 0.07 |
| H_stdFP | 0.01 | 0.01 | 0.43 | 0.19 | 0.04 | 0.04 | 0.07 |
| VegRFP | 0.38 | 0.58 | 0.00 | 0.00 | 0.03 | 0.22 | 0.22 |
| H05FP | 0.26 | 0.14 | 0.23 | 0.02 | 0.03 | 0.16 | 0.13 |
| H10FP | 0.29 | 0.14 | 0.36 | 0.00 | 0.01 | 0.13 | 0.10 |
| H20FP | 0.32 | 0.14 | 0.53 | 0.01 | 0.01 | 0.08 | 0.05 |
| H30FP | 0.31 | 0.12 | 0.63 | 0.02 | 0.00 | 0.05 | 0.02 |
| H40FP | 0.28 | 0.09 | 0.69 | 0.03 | 0.00 | 0.03 | 0.01 |
| H50FP | 0.26 | 0.08 | 0.71 | 0.04 | 0.00 | 0.02 | 0.00 |
| H60FP | 0.25 | 0.08 | 0.72 | 0.05 | 0.00 | 0.02 | 0.00 |
| H70FP | 0.23 | 0.07 | 0.74 | 0.05 | 0.00 | 0.01 | 0.00 |
| H80FP | 0.21 | 0.07 | 0.73 | 0.05 | 0.00 | 0.01 | 0.00 |
| H90FP | 0.19 | 0.05 | 0.72 | 0.07 | 0.00 | 0.00 | 0.01 |
| H95FP | 0.20 | 0.06 | 0.71 | 0.07 | 0.00 | 0.00 | 0.03 |
| D05FP | 0.12 | 0.18 | 0.04 | 0.18 | 0.11 | 0.19 | 0.18 |
| D10FP | 0.12 | 0.17 | 0.02 | 0.15 | 0.12 | 0.20 | 0.19 |
| D20FP | 0.13 | 0.17 | 0.01 | 0.12 | 0.11 | 0.23 | 0.23 |
| D30FP | 0.15 | 0.18 | 0.00 | 0.11 | 0.10 | 0.23 | 0.23 |
| D40FP | 0.17 | 0.19 | 0.00 | 0.10 | 0.09 | 0.25 | 0.23 |
| D50FP | 0.18 | 0.19 | 0.00 | 0.09 | 0.09 | 0.27 | 0.22 |
| D60FP | 0.18 | 0.18 | 0.00 | 0.09 | 0.08 | 0.25 | 0.22 |
| D70FP | 0.20 | 0.19 | 0.01 | 0.07 | 0.07 | 0.27 | 0.22 |
| D80FP | 0.21 | 0.20 | 0.01 | 0.07 | 0.06 | 0.25 | 0.22 |
| D90FP | 0.22 | 0.20 | 0.02 | 0.06 | 0.08 | 0.33 | 0.22 |
| D95FP | 0.28 | 0.27 | 0.04 | 0.03 | 0.07 | 0.30 | 0.21 |
| H_maxLP | 0.29 | 0.15 | 0.65 | 0.02 | 0.00 | 0.06 | 0.02 |
| H_meanLP | 0.33 | 0.16 | 0.42 | 0.02 | 0.05 | 0.10 | 0.04 |
| H_stdLP | 0.12 | 0.04 | 0.49 | 0.07 | 0.01 | 0.02 | 0.00 |
| VegRLP | 0.17 | 0.29 | 0.00 | 0.04 | 0.00 | 0.02 | 0.02 |
| H05LP | 0.12 | 0.05 | 0.13 | 0.14 | 0.05 | 0.09 | 0.02 |
| H10LP | 0.17 | 0.07 | 0.25 | 0.04 | 0.04 | 0.09 | 0.05 |
| H20LP | 0.23 | 0.09 | 0.39 | 0.00 | 0.01 | 0.08 | 0.04 |
| H30LP | 0.26 | 0.10 | 0.47 | 0.00 | 0.01 | 0.07 | 0.04 |
| H40LP | 0.26 | 0.10 | 0.58 | 0.00 | 0.01 | 0.07 | 0.04 |
| H50LP | 0.24 | 0.08 | 0.62 | 0.01 | 0.00 | 0.06 | 0.01 |
| H60LP | 0.26 | 0.10 | 0.66 | 0.01 | 0.00 | 0.05 | 0.00 |
| H70LP | 0.25 | 0.10 | 0.67 | 0.02 | 0.00 | 0.05 | 0.00 |
| H80LP | 0.26 | 0.11 | 0.69 | 0.02 | 0.00 | 0.05 | 0.00 |
| H90LP | 0.27 | 0.12 | 0.67 | 0.02 | 0.00 | 0.05 | 0.00 |
| H95LP | 0.27 | 0.12 | 0.67 | 0.03 | 0.00 | 0.05 | 0.02 |
| D05LP | 0.01 | 0.03 | 0.04 | 0.08 | 0.05 | 0.01 | 0.01 |
| D10LP | 0.03 | 0.04 | 0.01 | 0.12 | 0.08 | 0.03 | 0.01 |
| D20LP | 0.06 | 0.06 | 0.00 | 0.14 | 0.10 | 0.06 | 0.03 |
| D30LP | 0.08 | 0.07 | 0.00 | 0.13 | 0.09 | 0.07 | 0.04 |
| D40LP | 0.09 | 0.08 | 0.00 | 0.14 | 0.10 | 0.08 | 0.06 |
| D50LP | 0.10 | 0.08 | 0.01 | 0.12 | 0.09 | 0.08 | 0.07 |
| D60LP | 0.11 | 0.09 | 0.01 | 0.13 | 0.11 | 0.10 | 0.07 |
| D70LP | 0.12 | 0.08 | 0.03 | 0.12 | 0.08 | 0.09 | 0.07 |
| D80LP | 0.16 | 0.13 | 0.03 | 0.12 | 0.10 | 0.14 | 0.08 |
| D90LP | 0.19 | 0.15 | 0.05 | 0.08 | 0.07 | 0.13 | 0.09 |
| D95LP | 0.20 | 0.17 | 0.03 | 0.01 | 0.06 | 0.05 | 0.11 |


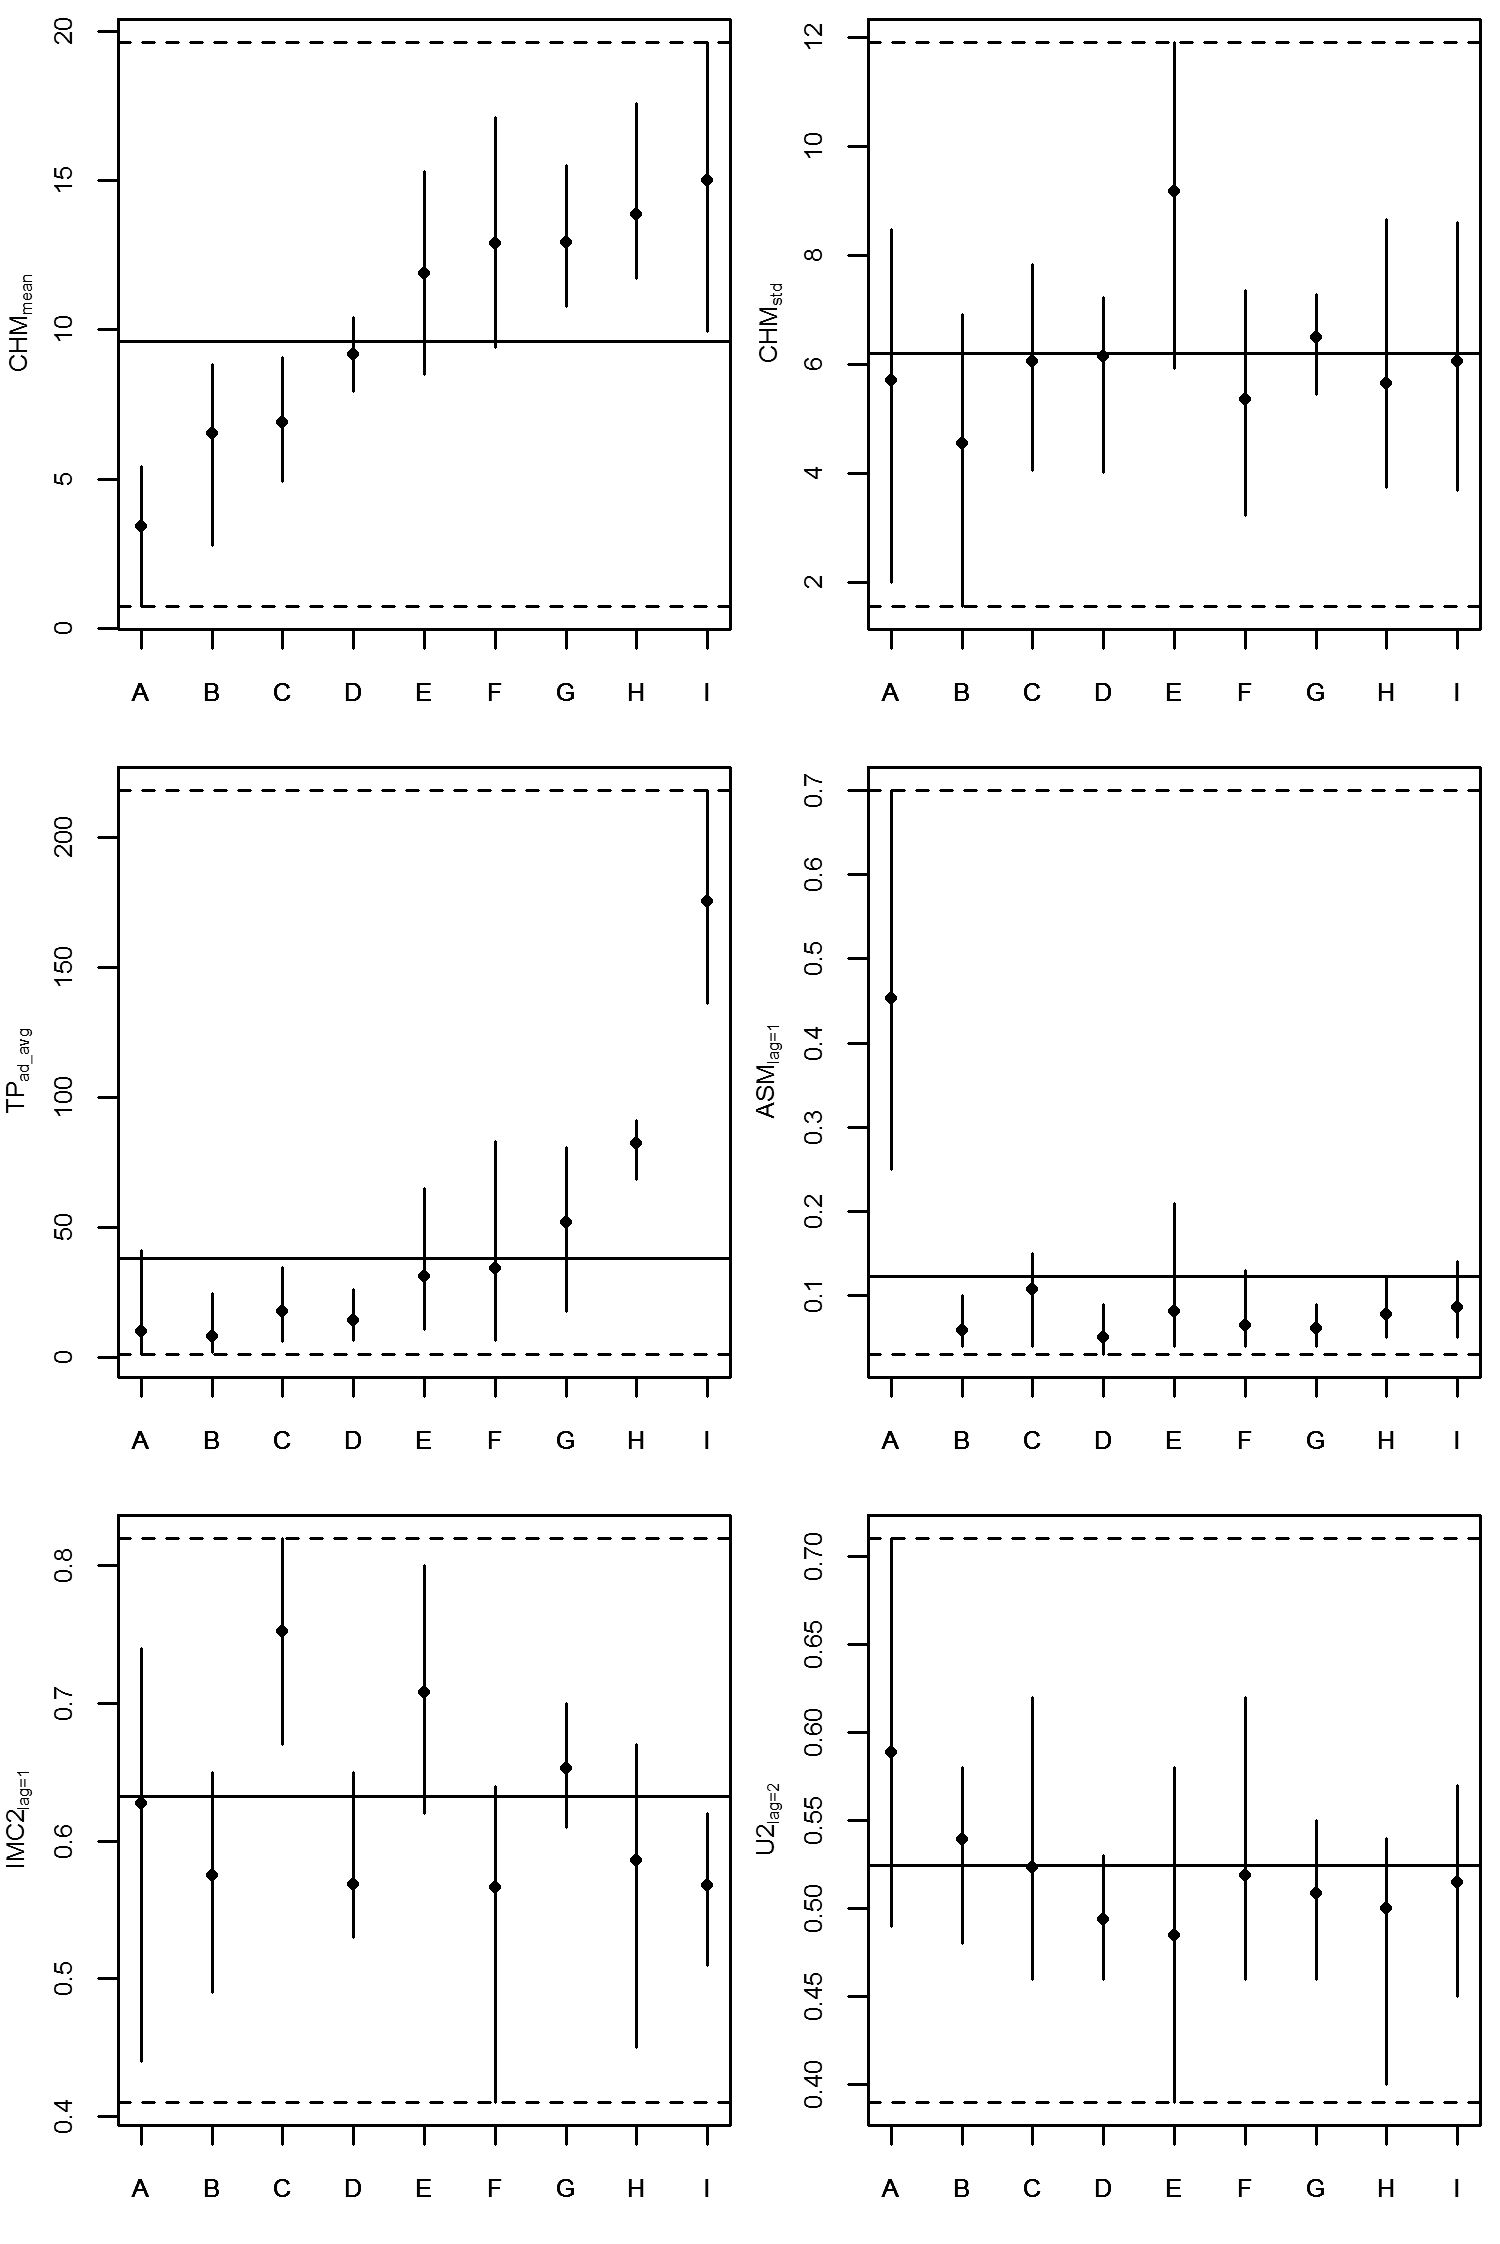


**Figure S1.** The distribution of the textural features CHMmean, CHMstd, TPad_avg, ASMlag = 1, IMC2lag = 1 and U2,lag = 2 in the sub-clusters formed by the *k*-Means algorithm. The clusters are arranged according to an increasing average CHMmean and labeled A-I.


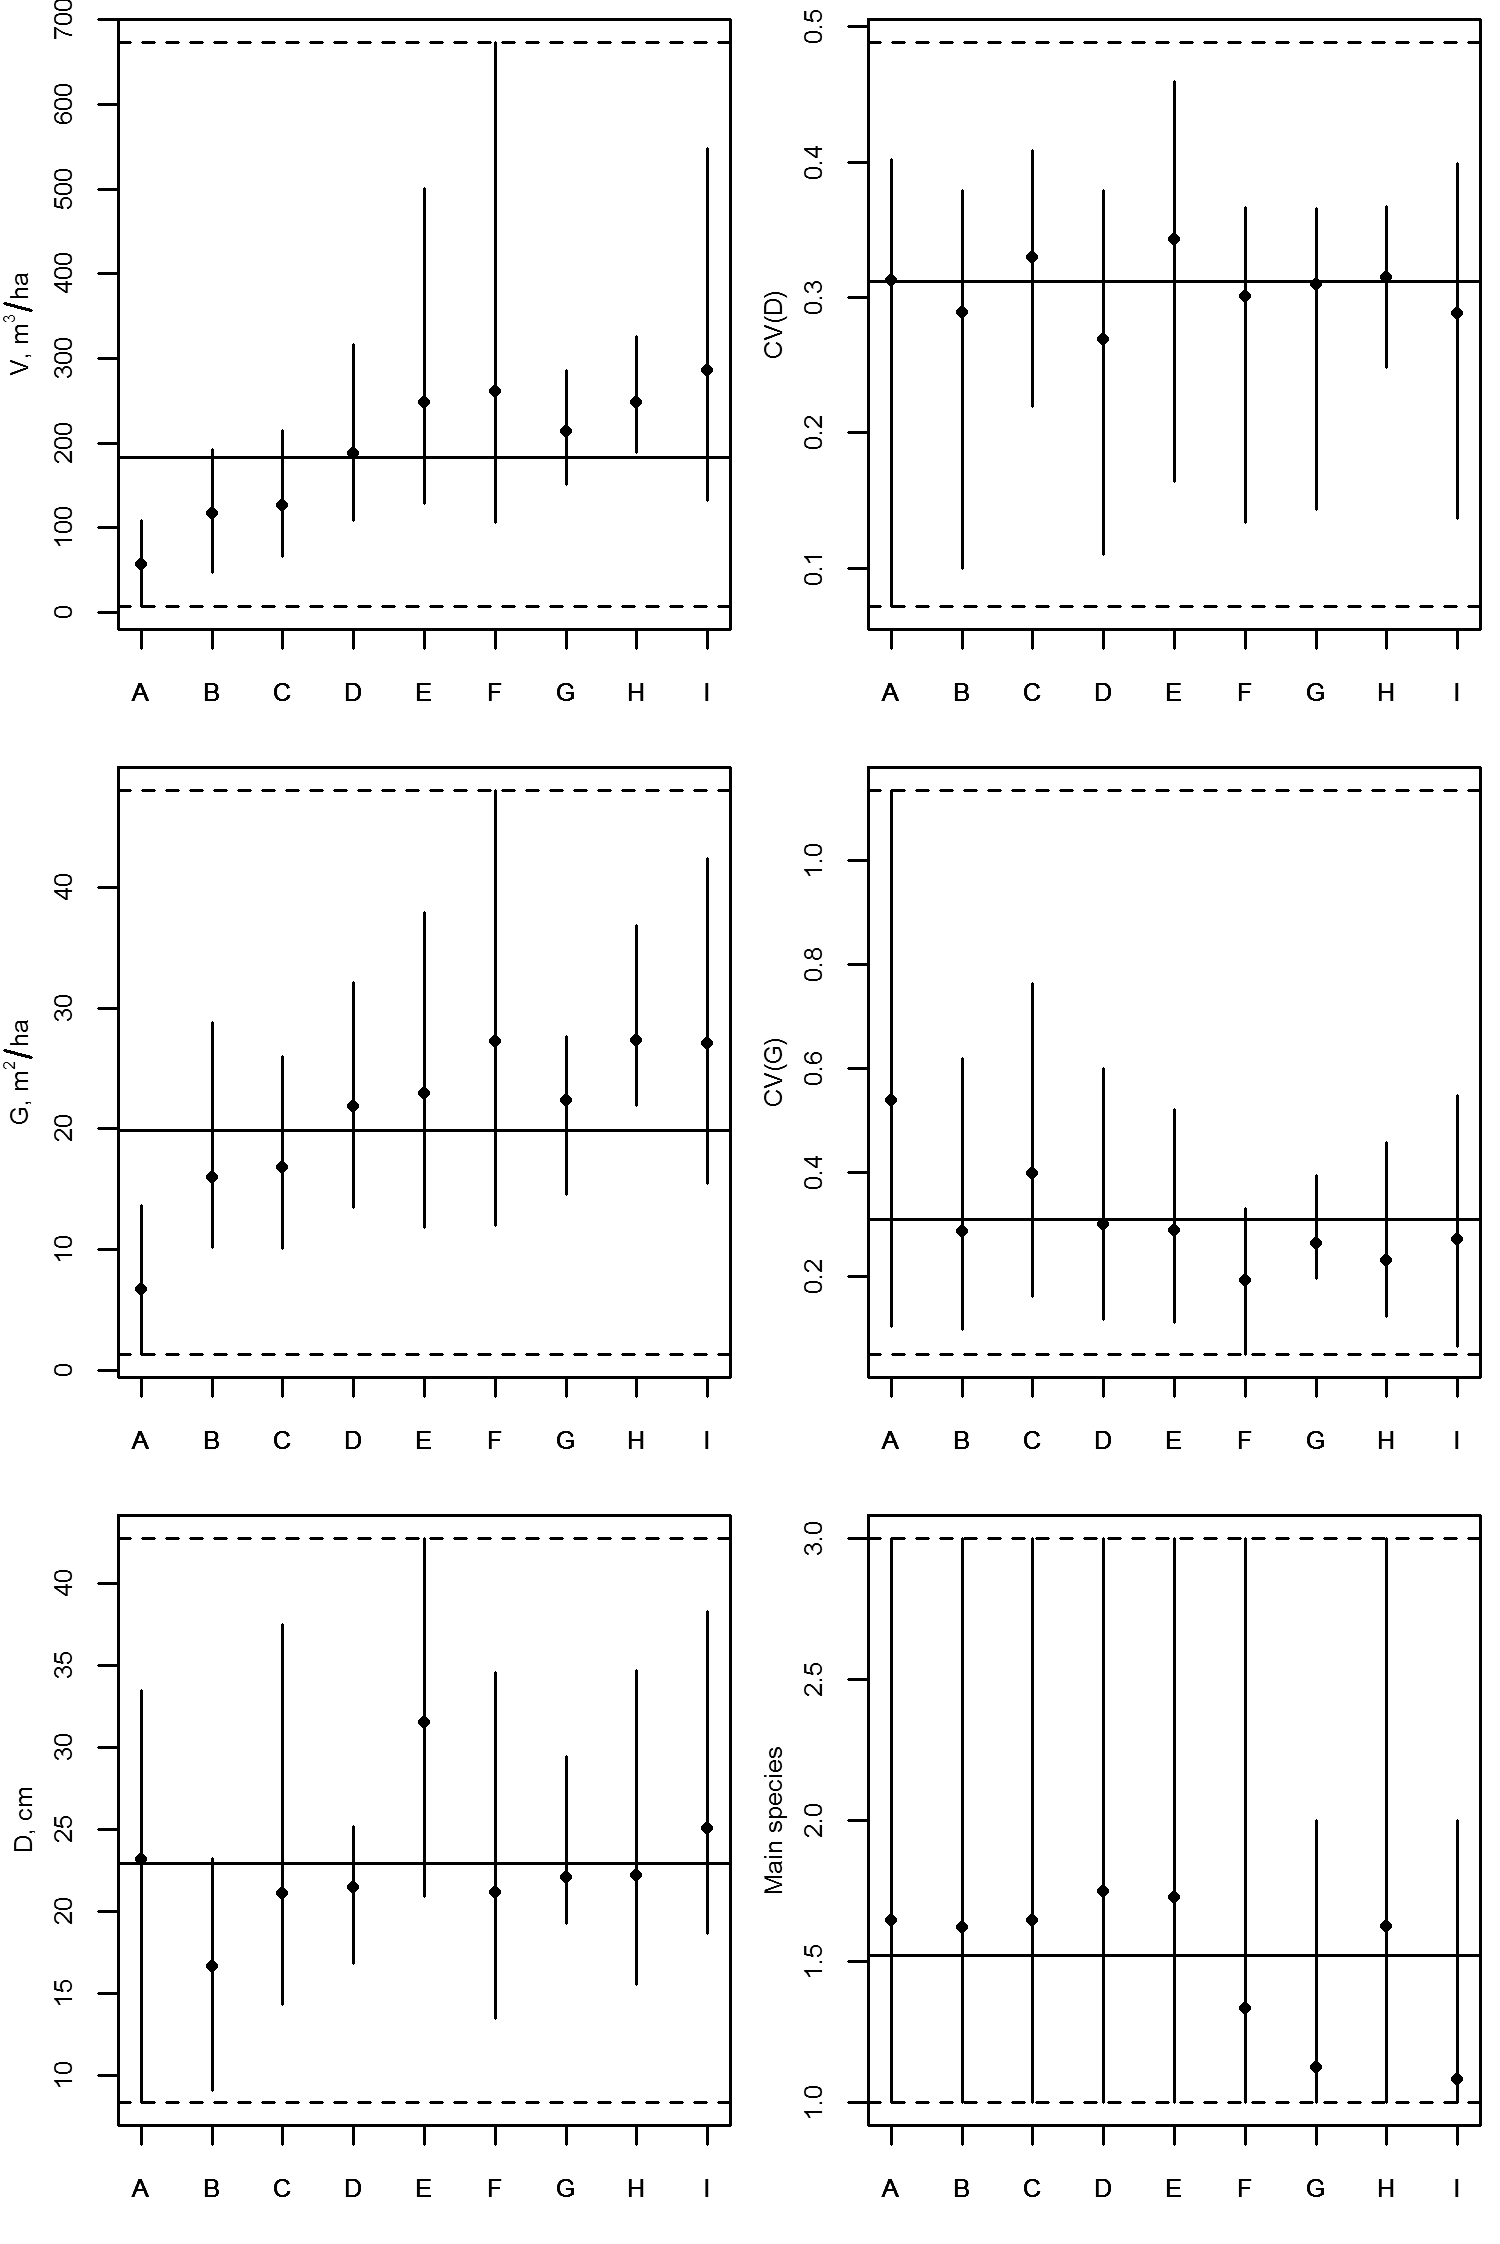


**Figure S2.** The distribution of the field-measured forest structural attributes according to the sub-clusters formed based on the ALS data. The cluster labels correspond to Figure S1.

© 2016 by the authors; licensee MDPI, Basel, Switzerland. This article is an open access article distributed under the terms and conditions of the Creative Commons by Attribution (CC-BY) license (http://creativecommons.org/licenses/by/4.0/).
